# Supplementary material
Source: publisher site journal article supplement (https://www.dovepress.com/article/535389)
Supplement: Supplementary file 1 [file 535389%20Supplementary%20Material.docx]

Appendix 1

**Appendix 1.** Sub analysis of OSCE mean scores by stations

| Years | Category | Attendance of the NPT  (Mean) | Non-attendance of the NPT  (Mean) | P-value |
| --- | --- | --- | --- | --- |
| **2022** | Musculoskeletal hip – Global score | 66.70 | 67.49 | 0.820 |
|  | Musculoskeletal hip – Medical history | 73.29 | 77.60 | 0.252 |
|  | Musculoskeletal hip – Physical examination | 56.95 | 51.50 | 0.308 |
|  | Musculoskeletal hip – Communication | 85.00 | 88.70 | 0.306 |
|  | Musculoskeletal knee – Global score | 70.37 | 61.57 | 0.016* |
|  | Musculoskeletal knee – Medical history | 68.03 | 62.71 | 0.146 |
|  | Musculoskeletal knee – Physical examination | 65.79 | 52.64 | 0.026* |
|  | Musculoskeletal knee – Communication | 84.26 | 77.71 | 0.037* |
|  | Neurology paralysis – Global score | 75.42 | 75.94 | 0.695 |
|  | Neurology paralysis – Medical history | 68.88 | 68.59 | 0.787 |
|  | Neurology paralysis – Physical examination | 75.33 | 74.41 | 0.966 |
|  | Neurology paralysis – Communication | 85.76 | 91.00 | 0.073 |
|  | Urology pyelonephritis – Global score | 80.83 | 83.80 | 0.254 |
|  | Urology pyelonephritis – Medical history | 78.34 | 85.60 | 0.026* |
|  | Urology pyelonephritis – Physical examination | 81.96 | 79.50 | 0.815 |
|  | Urology pyelonephritis – Communication | 85.80 | 86.40 | 0.824 |
|  | Cardiology angina – Global score | 82.39 | 83.94 | 0.460 |
|  | Cardiology angina – Medical history | 86.97 | 87.65 | 0.673 |
|  | Cardiology angina – Physical examination | 72.70 | 73.35 | 0.811 |
|  | Cardiology angina – Communication | 85.73 | 90.29 | 0.134 |
|  | Cardiology peripheral artery disease – Global score | 72.34 | 64.43 | 0.018* |
|  | Cardiology peripheral artery disease – Medical history | 75.92 | 70.43 | 0.213 |
|  | Cardiology peripheral artery disease – Physical examination | 63.03 | 54.79 | 0.153 |
|  | Cardiology peripheral artery disease – Communication | 77.21 | 65.71 | 0.019* |
|  | Lymphatic – Global score | 77.17 | 75.20 | 0.598 |
|  | Lymphatic – Medical history | 73.56 | 74.60 | 0.666 |
|  | Lymphatic – Physical examination | 79.54 | 75.50 | 0.350 |
|  | Lymphatic – Communication | 82.46 | 76.10 | 0.267 |
|  | Visceral peptic ulcer – Global score | 82.85 | 77.41 | 0.021* |
|  | Visceral peptic ulcer – Medical history | 81.82 | 76.18 | 0.041* |
|  | Visceral peptic ulcer – Physical examination | 79.85 | 74.12 | 0.207 |
|  | Visceral peptic ulcer – Communication | 90.06 | 85.41 | 0.107 |
|  | Pulmonary pneumonia – Global score | 71.61 | 69.29 | 0.609 |
|  | Pulmonary pneumonia – Medical history | 68.42 | 66.93 | 0.821 |
|  | Pulmonary pneumonia – Physical examination | 69.89 | 70.14 | 0.940 |
|  | Pulmonary pneumonia – Communication | 77.76 | 71.64 | 0.270 |
|  |  |  |  |  |
| **2023** | Musculoskeletal – Global score | 84.85 | 77.21 | 0.013* |
|  | Musculoskeletal – Medical history | 82.35 | 72.67 | 0.004** |
|  | Musculoskeletal – Physical examination | 89.47 | 82.46 | 0.025* |
|  | Musculoskeletal – Communication | 84.76 | 79.37 | 0.182 |
|  | Visceral – Global score | 83.67 | 78.70 | 0.082 |
|  | Visceral – Medical history | 88.22 | 81.74 | 0.046* |
|  | Visceral – Physical examination | 77.41 | 72.30 | 0.107 |
|  | Visceral – Communication | 87.00 | 85.56 | 0.643 |
|  | Emergency – Global score | 66.71 | 57.74 | 0.067 |
|  | Emergency – Medical history | 82.86 | 63.16 | 0.028* |
|  | Emergency – Physical examination | 60.89 | 51.95 | 0.149 |
|  | Emergency – Communication | 68.26 | 70.42 | 0.817 |
|  | Urology – Global score | 75.12 | 68.08 | 0.005** |
|  | Urology – Medical history | 83.68 | 79.79 | 0.245 |
|  | Urology – Physical examination | 65.18 | 54.79 | 0.007** |
|  | Urology – Communication | 87.38 | 83.62 | 0.117 |
|  | Cardiology – Global score | 84.33 | 77.33 | 0.018* |
|  | Cardiology – Medical history | 85.74 | 80.00 | 0.167 |
|  | Cardiology – Physical examination | 79.11 | 73.78 | 0.165 |
|  | Cardiology – Communication | 88.67 | 75.56 | 0.006** |
|  | Prostate – Global score | 78.63 | 70.63 | 0.022 |
|  | Prostate – Medical history | 73.77 | 58.84 | 0.002** |
|  | Prostate – Physical examination | 76.46 | 75.26 | 0.981 |
|  | Prostate – Communication | 93.23 | 84.79 | 0.035* |
|  | Pulmonary – Global score | 79.91 | 76.83 | 0.005** |
|  | Pulmonary – Medical history | 78.41 | 75.33 | 0.901 |
|  | Pulmonary – Physical examination | 85.59 | 77.50 | 0.011* |
|  | Pulmonary – Communication | 78.38 | 79.04 | 0.983 |
|  | Neurology – Global score | 72.44 | 62.44 | 0.018* |
|  | Neurology – Medical history | 64.26 | 61.59 | 0.516 |
|  | Neurology – Physical examination | 71.74 | 58.04 | 0.004** |
|  | Neurology – Communication | 86.22 | 75.33 | 0.024* |
|  | Pulmonary emboli – Global score | 79.06 | 72.95 | 0.022* |
|  | Pulmonary emboli – Medical history | 82.03 | 76.74 | 0.099 |
|  | Pulmonary emboli – Physical examination | 77.37 | 70.42 | 0.191 |
|  | Pulmonary emboli – Communication | 76.86 | 70.53 | 0.272 |
|  |  |  |  |  |

* P < .05 and ** p< .01
